# Supplementary material for: miR-378 associated with proliferation, migration and apoptosis properties in A549 cells and targeted NPNT in COPD
Source: PeerJ. 2022 Sep 15;10:e14062. doi: 10.7717/peerj.14062 (PMC9482771; doi:10.7717/peerj.14062)
Supplement: Supplemental Information 4 [file peerj-10-14062-s004.xlsx]

## Sheet: clone
	clone result
	groups	NC			OVEX
	clone	58	66	52	166	176	179
	groups	NC	OVEX			T-Test			P value
	mean	58.6667	173.667			NC	vs	OVEX	3.43312e-05
	STDEV	7.02377	6.80686
