# Supplementary material for: miR-378 associated with proliferation, migration and apoptosis properties in A549 cells and targeted NPNT in COPD
Source: PeerJ. 2022 Sep 15;10:e14062. doi: 10.7717/peerj.14062 (PMC9482771; doi:10.7717/peerj.14062)
Supplement: Supplemental Information 5 [file peerj-10-14062-s005.xlsx]

## Sheet: data analysis
raw data of apoptosis
	M1	M	ALL
NC	4.29	95.71	100
	4.56	95.44	100
	4.83	95.17	100
OVEX	1.23	98.77	100
	1.21	98.79	100
	1.56	98.44	100
Apoptosis (%), mean+/-SD.
	Apoptosis (%)
NC	4.29
	4.56
	4.83
OVEX	1.23
	1.21
	1.56
	AVERAGE	STDEV
NC	4.56	0.2651
OVEX	1.33	0.1959
T-test Analysis		P-value
NC vs OVEX		7.09612e-05
