# Supplementary material for: miR-378 associated with proliferation, migration and apoptosis properties in A549 cells and targeted NPNT in COPD
Source: PeerJ. 2022 Sep 15;10:e14062. doi: 10.7717/peerj.14062 (PMC9482771; doi:10.7717/peerj.14062)
Supplement: Supplemental Information 6 [file peerj-10-14062-s006.xlsx]

## Sheet: data analysis
96-well plate scratch result
Time	NC					UP
0h	21.82	24.03	19.82	17.72	16.33	16.04	20.43	22.64	23.28	19.86
8h	19	19.89	17.43	14.37	13.23	11.62	14.76	17.47	16.86	14.15
24h	11.87	12.01	11.66	8.91	6.77	5.53	6.24	10.34	11.12	8.2
compare to 0h
Time	NC					UP
0h	0	0	0	0	0	0	0	0	0	0
8h	2.82	4.14	2.39	3.35	3.1	4.42	5.67	5.17	6.42	5.71
24h	9.95	12.02	8.16	8.81	9.56	10.51	14.19	12.3	12.16	11.66
compare to 0h
Time	NC					UP
0h	0	0	0	0	0	0	0	0	0	0
8h	0.13	0.17	0.12	0.19	0.19	0.28	0.28	0.23	0.28	0.29
24h	0.46	0.5	0.41	0.5	0.59	0.66	0.69	0.54	0.52	0.59
mean and SD
	Time	NC	UP
migration rate	8h	0.16	0.27
	24h	0.49	0.6
STDEV	8h	0.03	0.02
	24h	0.07	0.07
pair t-test
T-Test analysis			P Value
			8h	24h
NC vs UP			0.000280577	0.0407557
