# Supplementary material for: miR-378 associated with proliferation, migration and apoptosis properties in A549 cells and targeted NPNT in COPD
Source: PeerJ. 2022 Sep 15;10:e14062. doi: 10.7717/peerj.14062 (PMC9482771; doi:10.7717/peerj.14062)
Supplement: Supplemental Information 7 [file peerj-10-14062-s007.xlsx]

## Sheet: Transwell raw data
	Transwell, 200X, cell number
	200X, count cell unmber	NC			UP
		repeat1	repeat2	repeat3	repeat1	repeat2	repeat3
	field 1	28	31	21	128	138	91
	field 2	37	21	11	136	121	112
	field 3	20	22	25	102	132	115
	field 4	12	14	27	112	114	87
	field 5	13	28	18	116	118	108
	field 6	20	16	26	128	111	109
	field 7	18	13	16	110	114	116
	field 8	27	15	19	102	105	122
	field 9	25	16	15	105	96	105
	Migratory cells per field	22.2222	19.5556	19.7778	115.444	116.556	107.222
	Average	20.5185			113.074
	Stdev.	1.47963			5.09821
	Migration Fold Change	1.08303	0.953069	0.963899	5.62635	5.68051	5.22563
	Average	1			5.51083
	Stdev.	0.0721119			0.248469
	T-Test
	Migratory cells per field	AVERAGE	STDEV.		T-Test分析			P VALUE
	NC	20.5185	1.47963		NC	vs	ovex	7.16218e-06
	ovex	113.074	5.09821
	Migration Fold Change	AVERAGE	STDEV.		T-Test分析			P VALUE
	NC	1	0.0721119		NC	vs	ovex	7.16218e-06
	ovex	5.51083	0.248469
