# Supplementary material for: miR-378 associated with proliferation, migration and apoptosis properties in A549 cells and targeted NPNT in COPD
Source: PeerJ. 2022 Sep 15;10:e14062. doi: 10.7717/peerj.14062 (PMC9482771; doi:10.7717/peerj.14062)
Supplement: Supplemental Information 9 [file peerj-10-14062-s009.xlsx]

## Sheet: 3'UTR luciferase检测报告 
luciferase report
cell line	A549
plate	24-well plate，500 μl/well
time	48 h
Co-transfection amount of plasmid:	3' UTR Luciferase 0.1 μg，miRNA 0.4 μg，Renilla 0.02ug
Groups
groups	name
exp1	3’UTR-NC (GOSE0141666)+miRNA-NC (GMUE0141663)
exp2	3’UTR-NC (GOSE0141666)+miRNA (GMUE0141663)
exp3	3’UTR (GOSE0141666)+miRNA-NC (GMUE0141663)
exp4	3’UTR (GOSE0141666)+miRNA (GMUE0141663)
exp5	3’UTR-M (GOSE0141664)+miRNA—NC (GMUE0141663)
exp6	3’UTR-M (GOSE0141664)+miRNA (GMUE0141663)
pos miRNA NC	pos 3' UTR+miRNA-NC
pos miRNA	pos 3' UTR+ pos miRNA
raw data
item	groups	repeat1	repeat2	repeat3		item	groups	repeat1	repeat2	repeat3
Firefly luminescence	exp1	17133	17007	17012		Renilla luminescence	exp1	89620	89620	90880
	exp2	15440	15634	15647			exp2	83570	82710	83130
	exp3	21672	21237	21095			exp3	96710	97080	97480
	exp4	15619	15585	15683			exp4	80970	81270	81380
	exp5	23868	22118	20858			exp5	97930	100530	98790
	exp6	24696	24632	24382			exp6	97310	98070	98680
	pos miRNA NC	18433	18410	18527			pos miRNA NC	104960	107340	108590
	pos miRNA	10064	10693	10588			pos miRNA	117370	120570	117170
1. Firefly /Renilla luminescence						Mean and Stdev
Firefly /Renilla luminescence	groups	repeat1	repeat2	repeat3		Firefly /Renilla luminescence	groups	AVERAGE	STDEV.
	exp1	0.191174	0.189768	0.187192			exp1	0.189378	0.00201942
	exp2	0.184755	0.189022	0.188223			exp2	0.187333	0.0022682
	exp3	0.224093	0.218758	0.216403			exp3	0.219751	0.00393974
	exp4	0.192899	0.191768	0.192713			exp4	0.19246	0.000606258
	exp5	0.243725	0.220014	0.211135			exp5	0.224958	0.0168483
	exp6	0.253787	0.251168	0.247081			exp6	0.250679	0.00337933
	pos miRNA NC	0.175619	0.171511	0.170614			pos miRNA NC	0.172582	0.00266871
	pos miRNA	0.0857459	0.0886871	0.0903644			pos miRNA	0.0882658	0.00233789
2. Firefly /Renilla luminescence fold change						Mean and Stdev
Firefly /Renilla luminescence fold change	groups	repeat1	repeat2	repeat3		Firefly /Renilla luminescence fold change	groups	AVERAGE	STDEV.
	exp1	1.00948	1.00206	0.988457			exp1	1	0.0106634
	exp2	0.975591	0.99812	0.993903			exp2	0.989205	0.0119771
	exp3	1.01976	0.995479	0.984765			exp3	1	0.0179282
	exp4	0.877804	0.87266	0.876961			exp4	0.875808	0.00275884
	exp5	1.08343	0.978023	0.938552			exp5	1	0.0748954
	exp6	1.12815	1.11651	1.09835			exp6	1.11434	0.015022
	pos miRNA NC	1.0176	0.993797	0.988601			pos miRNA NC	1	0.0154635
	pos miRNA	0.496843	0.513885	0.523604			pos miRNA	0.511444	0.0135466
3.Normalized Firefly /Renilla luminescence fold						Mean and Stdev
Normalized fold change	groups	repeat1	repeat2	repeat3		Normalized fold change	groups	AVERAGE	STDEV.
	exp2	0.986237	1.00901	1.00475			exp2	1	0.0121078
	exp4	0.887384	0.882184	0.886531			exp4	0.885366	0.00278895
	exp6	1.14046	1.12869	1.11033			exp6	1.1265	0.015186
	pos miRNA NC	1.0176	0.993797	0.988601			pos miRNA NC	1	0.0154635
	pos miRNA	0.496843	0.513885	0.523604			pos miRNA	0.511444	0.0135466
4. T-Test：
	P VALUE
exp 2 VS 4	8.96548e-05
exp 4 VS 6	1.11055e-05
pos miRNA NC VS pos miRNA	2.08192e-06
Figure
